# Supplementary material
Source: PubMed Central journal article supplement (PMC6134211)
Supplement: NIHMS189897-supplement-1_si_001.pdf [file NIHMS189897-supplement-1_si_001.pdf]

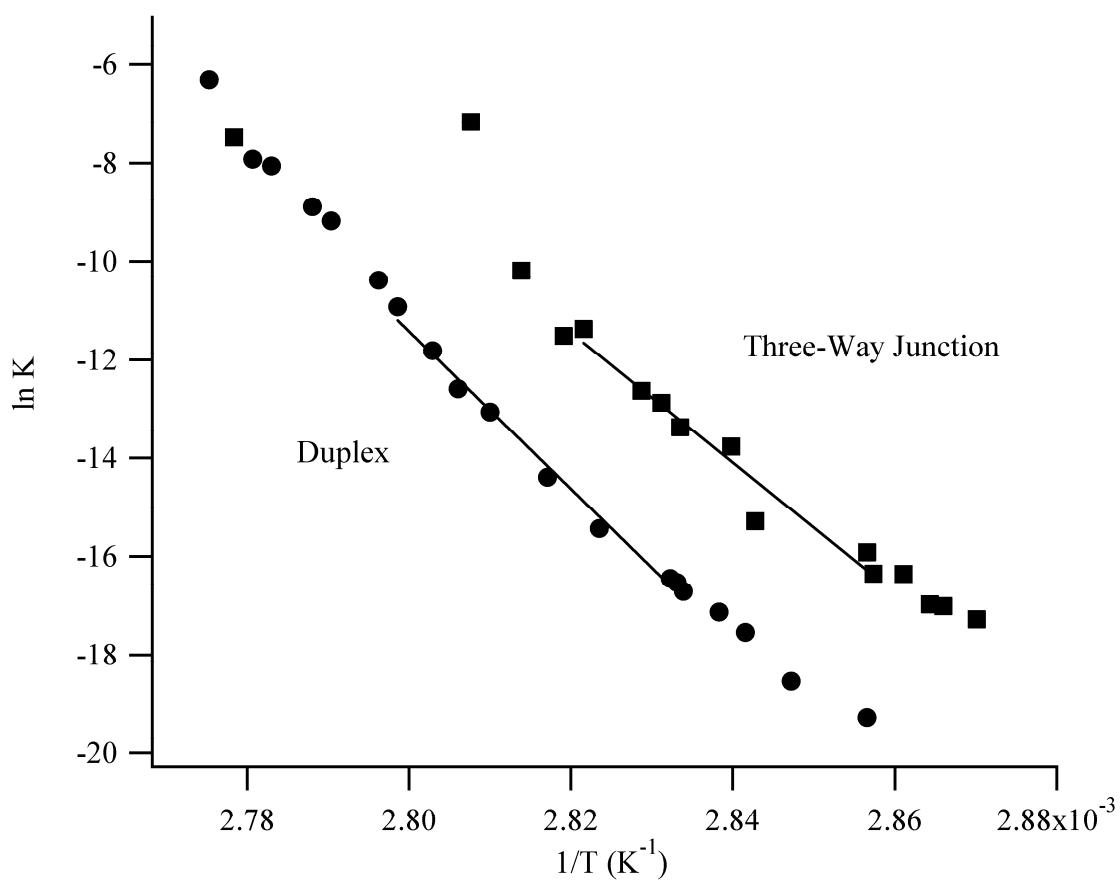

Fig. 1S: van't Hoff analysis of the melting profiles for the three-way junction in Figure 1A (squares) and the 50-mer duplex in Fig. 1B (circles). The data were fit over the range of 20-90% conversion with the assumptions of no change in the heat capacity for the reactions and a two-state conversion. Linear fits yield  $\Delta H^\circ = 262 \pm 24$  kcal/mole and  $\Delta S^\circ = 715 \pm 68$  cal/(mole K) at 79 °C for the three-way junction and  $\Delta H^\circ = 317 \pm 13$  kcal/mole and  $\Delta S^\circ = 865 \pm 35$  cal/(mole K) at 82 °C for the duplex.
